# Pocket Guide to Addiction Assessment and Treatment

Edited by Petros Levounis, M.D., M.A.,  
Erin Zerbo, M.D., and Rashi Aggarwal, M.D.

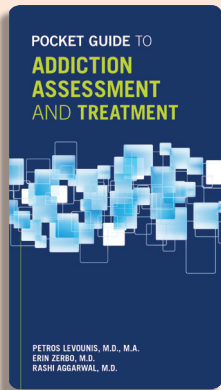

*The Pocket Guide to Addiction Assessment and Treatment* is designed specifically to aid a wide range of clinicians, regardless of their training in addiction, to more confidently assess and treat this patient population. With an accessible, easily referenced format, this book serves as a go-to resource for general psychiatrists other practitioners involved in the addiction treatment field. And because all of the diagnostic discussions are DSM-5<sup>®</sup>-based, readers can be confident that they're getting the most relevant and up-to-date guidance on the topic.

2016 • 379 pages • ISBN 978-1-58562-512-3 • Paperback  
\$65.00 • Item #62512

2016 • 379 pages • ISBN 978-1-58562-512-3 • eBook  
\$52.00 • Item #37072

AMERICAN  
PSYCHIATRIC  
ASSOCIATION  
PUBLISHING

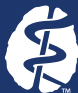

www.appi.org  
Email: appi@psych.org  
Phone: 1-800-368-5777

AH1820A

# Our Work Matters

Hope. Recovery. Wellbeing.

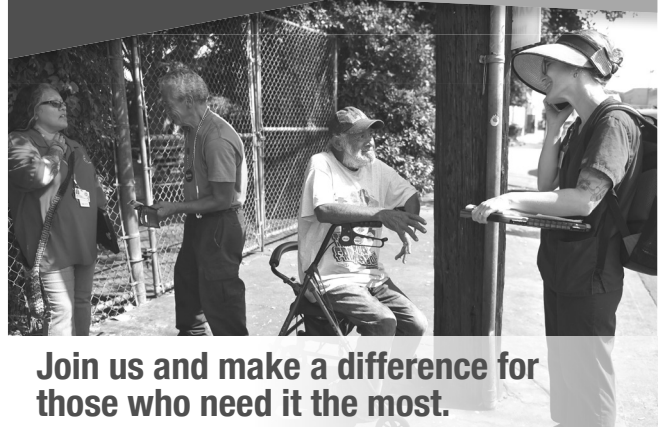

**Join us and make a difference for those who need it the most.**

Los Angeles County Department of Mental Health is a nationally recognized leader providing a wide range of services to one of the largest populations in the country. We invite you to join our team as we help the most vulnerable in our community find a path to independence and personal recovery.

Starting annual salary immediately post residency completion is **\$233,784** with **potential bonuses of \$32,000 annually**. Student loan repayment and recruitment incentives available.

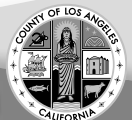

[www.psychiatristjobs.la](http://www.psychiatristjobs.la)

## FREE Online Subscription to *Psychiatric Services* for APA Resident-Fellow Members (RFMs)!

American Psychiatric Association Resident-Fellow Members (RFMs) can receive a free online subscription to *Psychiatric Services*.

Visit [ps.psychiatryonline.org](http://ps.psychiatryonline.org) for full-text access to all of the content in this highly ranked, peer-reviewed monthly journal. *Psychiatric Services* focuses on service delivery in organized systems of care, evolving best practices, and federal and state policies that affect the care of people with mental illnesses.

**Please visit [ps.psychiatryonline.org](http://ps.psychiatryonline.org) and log in with your APA username and password.**

Psychiatry residents who are not currently APA Resident-Fellow Members should consider membership in the American Psychiatric Association. The benefits provided to residents are an example of how the APA serves the needs of its members throughout their careers. The low introductory dues APA extends to RFMs are even waived for the first year. Please visit [www.psychiatry.org/join-apa](http://www.psychiatry.org/join-apa) for more information.

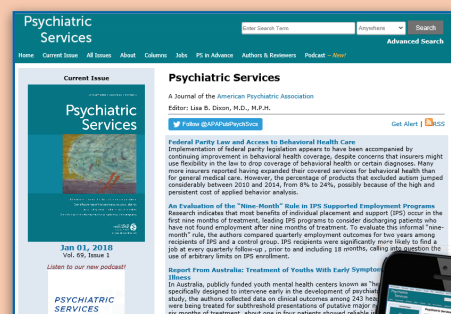

Tune in to our monthly podcast.

PSYCHIATRIC  
SERVICES  
FROM PAGES  
TO PRACTICE

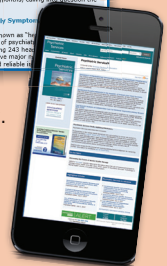

AMERICAN  
PSYCHIATRIC  
ASSOCIATION  
PUBLISHING

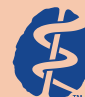

www.appi.org  
Email: appi@psych.org  
Toll-Free: 1-800-368-5777

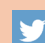

Follow @APAPubPsychSvc

AH1818A

*The Newest Addition to APA Publishing's Portfolio of Journals*

# The American Journal of Psychotherapy

[psychotherapy.psychiatryonline.org](http://psychotherapy.psychiatryonline.org)

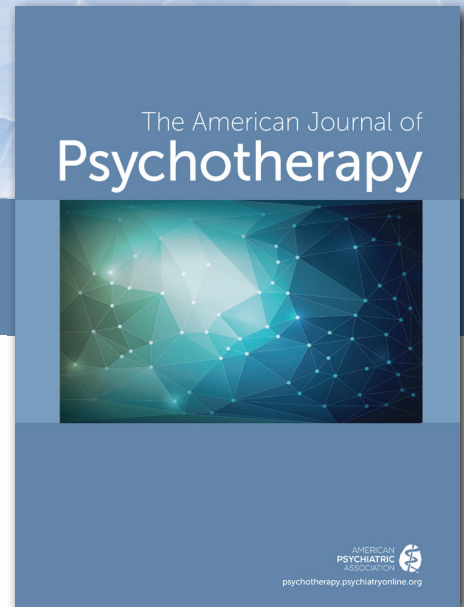

## Holly A. Swartz, M.D., Editor-in-Chief

*The American Journal of Psychotherapy* is a peer-reviewed, interdisciplinary journal published quarterly by the American Psychiatric Association. Begun in 1947 by the Association for the Advancement of Psychotherapy, *The American Journal of Psychotherapy* provides a forum for advancing the theory, science, and clinical practice of psychotherapy, publishing articles that expand the understanding of psychotherapies, especially in the domains of efficacy, process, education, and practice.

The journal publishes empirical papers on psychotherapy outcomes, process, measurement, and education. Maintaining a strong clinical focus, it welcomes case reports, review articles, and training tools that will guide and shape clinical practice.

*The American Journal of Psychotherapy* invites a broad range of perspectives from all psychotherapy disciplines, including but not limited to psychodynamic, interpersonal, cognitive- or dialectical-behavioral, existential, emotion-focused, problem-solving, mentalizing, mindfulness-based, and client-centered approaches.

*The American Journal of Psychotherapy* inclusively addresses topics across treatment modalities, age groups, genders, races and ethnicities, and diagnoses. The journal serves the international community by curating a vibrant, pluralistic, dialogue about psychotherapy that ultimately will inform clinical care.

2018 • Vol. 71  
Frequency: Quarterly  
Online ISSN: 2575-6559  
[psychotherapy.psychiatryonline.org](http://psychotherapy.psychiatryonline.org)

**Subscribe Now!** .....

 **Visit [appi.org](http://appi.org) for pricing and more information!**

AMERICAN  
PSYCHIATRIC  
ASSOCIATION  
PUBLISHING  [appi.org](http://appi.org)  
1-800-368-5777  
[appi@psych.org](mailto:appi@psych.org)

[psychotherapy.psychiatryonline.org](http://psychotherapy.psychiatryonline.org)
