# Psychiatric Services

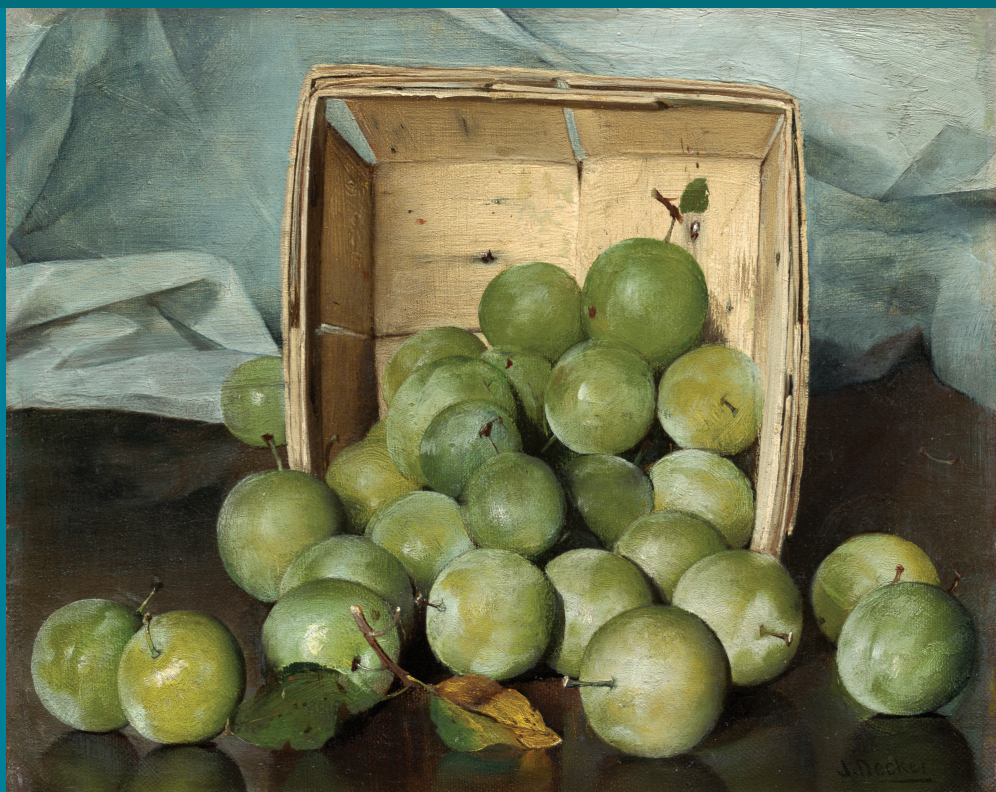

Effects of risk-based firearm seizure laws on suicide rates

New column: Social Determinants of Mental Health

Addressing veteran homelessness to prevent veteran suicides

Predicting outcomes of coordinated specialty care for early psychosis
